# Supplementary material
Source: publisher site journal article supplement (https://www.dovepress.com/get_supplementary_file.php?f=297626.docx)
Supplement: Supplementary file 1 [file get_supplementary_file.php]

**Table S1: Bivariate and multivariate logistic regression analysis of medication abortion knowledge and its explanatory variables**

| Variables | **Yes** | **No** | **OR (95% CI)** | **AOR (95%CI)** |
| --- | --- | --- | --- | --- |
| Age group  <19  20-24  25-29  ≥ 30 | 54  62  99  82 | 34  20  34  27 | 0.52(0.28-0.96)**  1.02(0.53-2.00)  0.96(0.54-1.72)  1 | 0.57(0.29-1.12)  1.03(0.50-2.13)  1.06(0.56-1.98)  1 |
| Place of birth  Addis Ababa  Out of Addis Ababa | 220  77 | 74  41 | 1.58(1.00-2.51)*  1 | 1.43(0.86-2.36)  1 |
| With whom you live?  With my relatives  With my boyfriend  With my husband  With my friends  Alone  With my family | 48  58  65  56  43  27 | 20  9  30  10  22  24 | 2.13(1.00-4.55)*  5.73(2.35—13.97)***  1.93(0.96-3.88)*  4.98(2.09-11.87)***  1.74(0.82-3.69)*  1 | 2.34(1.05-5.25)**  6.08(2.41-15.33)***  1.83(0.87-3.84)  5.35(2.18-13.16)***  1.80(0.81-4.00)  1 |
| Your father’s educational level  Illiterate  primary education  up to secondary education  above secondary school | 118  59  47  73 | 62  25  14  14 | 1  1.24(0.71-2.17)  1.76(0.90-3.45) *  2.74(1.43-5.24)*** | 1  1.19(0.65-2.16)  2.03(1.01-4.10)*  2.80(1.42-5.52)*** |
| medical related family profession  Yes  No | 88  209 | 42  73 | 0.73(0.46-1.15)*  1 | 0.77(0.47-1.25)  1 |
| History of unwanted pregnancy?  Yes  No | 147  150 | 46  69 | 1.47(0.95-2.28) *  1 | 1.37(0.86-2.20)  1 |

NB: *= p-value < 0.2, ** = p-value < 0.05, *** = p-value < 0.01

**Table S2:** **Bivariate and multivariate logistic regression analysis towards medication abortion practice and its explanatory variables (n= 412)**

| Variables | **Yes** | **No** | **OR (95% CI)** | **AOR (95%CI)** |
| --- | --- | --- | --- | --- |
| Your level of education  Illiterate  Primary education  Secondary education  College/university | 6 30  43 57 | 19  73  102  82 | 1  1.30(0.47-3.58)  1.34(0.50-3.57)  2.20(0.83-5.85)* | 1  2.51(0.70-8.94)  3.54(1.02-12.26)**  3.49(1.02-11.92)** |
| Income  <500  500-1000  >1000 | 35  32  69 | 103  79  94 | 1  0.46(0.28-0.76)***  0.55(0.33-0.92)** | 1  1.12(0.51-2.47)  2.197(1.02-4.75)* |
| Do-you-know-a-family member/friend/neighbour/who-had-terminated pregnancy?  Yes  No | 115  21 | 86  190 | 12.1(7.12-20.56)***  1 | 0.21(0.02-2.39)  1 |
| History of unwanted pregnancy?  Yes  No | 114  79 | 79  22 | 12.92(7.64-21.86)***  1 | 11.77(1.11-12.46)**  1 |
| Do you know contraceptive?  Yes  No | 24  104 | 24  46 | 1  1.70(0.90-3.19)* | 1  0.65(0.32-1.30) |

**NB: *= p-value < 0.2, ** = p-value < 0.05, *** = p-value < 0.01**
